# Supplementary material
Source: PubMed Central journal article supplement (PMC6054131)
Supplement: NIHMS944390-supplement-1.pdf [file NIHMS944390-supplement-1.pdf]

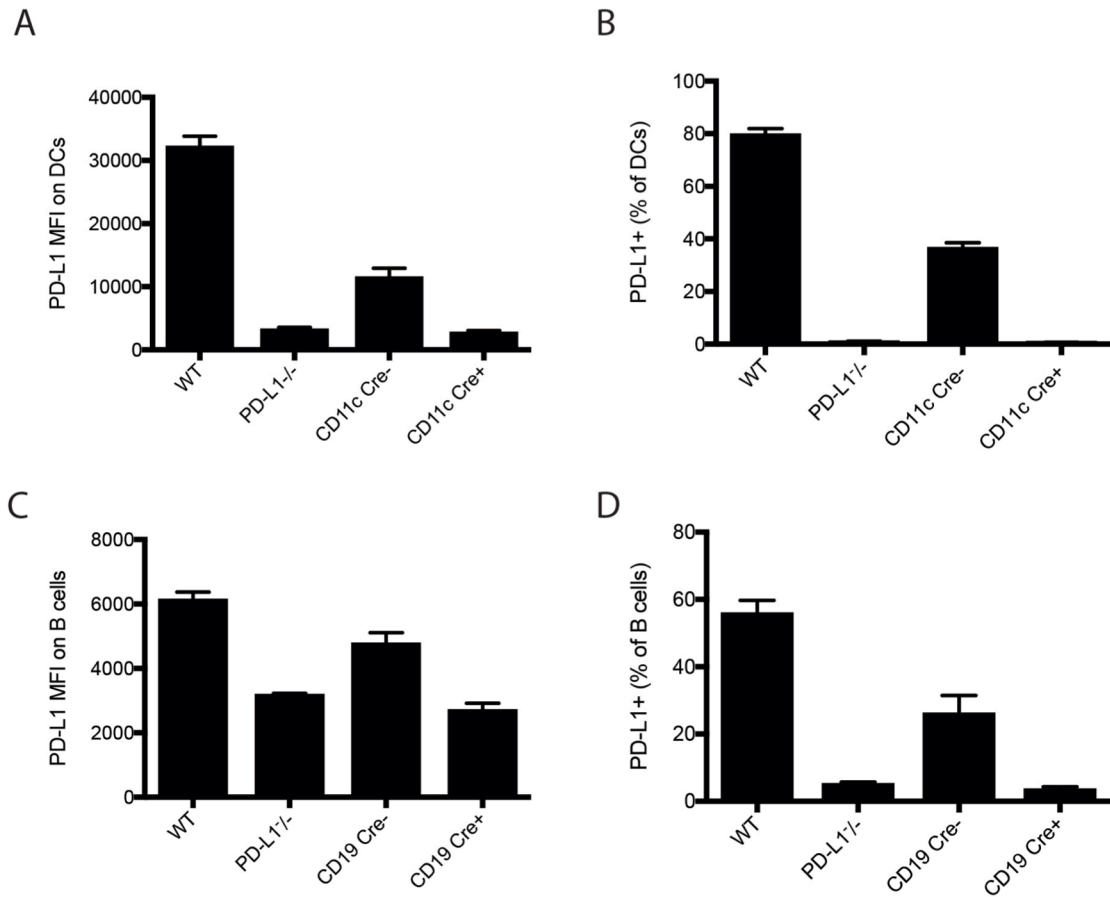

**Figure S1.** Characterization of PD-L1 expression in unimmunized conditional knockout mice. **(A)** PD-L1 expression on iLN DCs in CD11cCre<sup>+</sup> PD-L1 floxed (F/F) mice compared to the indicated controls. Data are depicted as MFI. **(B)** Percentage of PD-L1<sup>+</sup> DCs in untreated CD11cCre<sup>+</sup> PD-L1 F/F and control mice. **(C)** PD-L1 expression on iLN B cells in CD19Cre<sup>+</sup> PD-L1 floxed (F/F) mice. **(D)** Percentage of PD-L1<sup>+</sup> B cells in untreated CD19Cre<sup>+</sup> PD-L1 F/F and control mice. Data indicate means +/- standard error of at least 3 mice and are representative of 2 independent experiments, Student's two-tailed unpaired t test.
